# Supplementary material for: Palliative Care Professionals’ Message to Others: An Ethnographic Approach
Source: MDPI journal article supplement (doi:10.3390/ijerph18105348), 2021-05-17

# How do I want you to know me?

## Palliative care professionals' message to other professionals.

Carla Reigada (1,2), Carlos Centeno (1,2, 3), Edna Gonçalves (4), Maria Arantzamendi(1,2)

(1) ATLANTES Research Group; Institute for Culture and Society; University of Navarra (Spain).

(2) Health Research Institute of Navarra (IdiSNA) (Spain).

(3) Palliative Medicine Department, Clínica Universidad de Navarra (Spain).

(4) Palliative Care Service, Centro Hospitalar Universitário de São João, E.P.E. (Portugal).

Reigada, C. *et al.* Palliative Care Professionals' Message to Others: An Ethnographic Approach.

*Int. J. Environ. Res. Public Health* 2021, 18, xx.

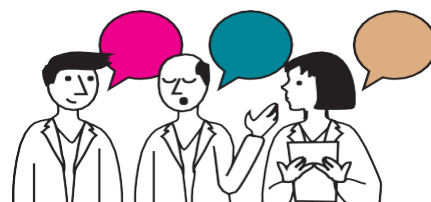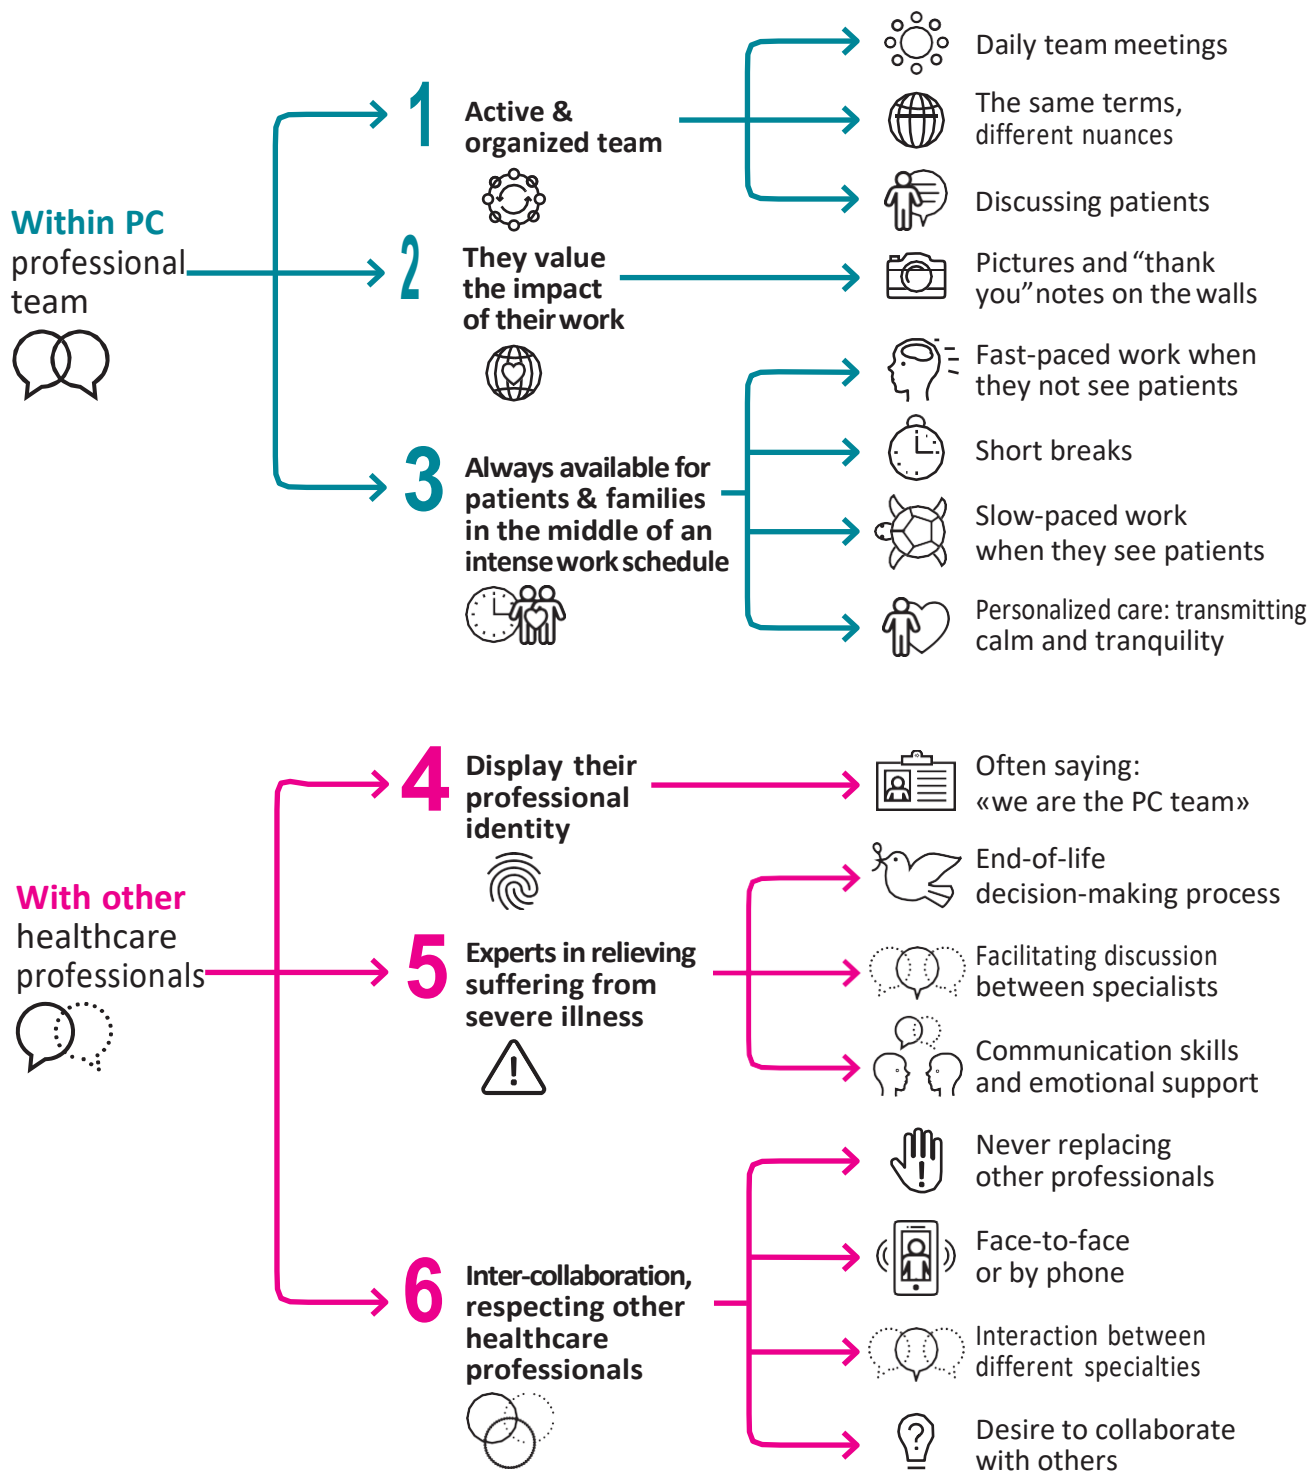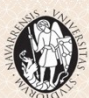

Supplement: s1 [file s1]
